# Supplementary material for: Hydrophobicity of protein determinants influences the recognition of substrates by EDEM1 and EDEM2 in human cells
Source: PubMed Central journal article supplement (PMC4340280; doi:10.1186/s12860-015-0047-7), 2015-02-06

**Additional file 1. Characteristics of RTA<sub>DHF</sub> and RTA<sub>IHF</sub>.** (A) Wild-type RTA, RTA<sub>DHF</sub> and RTA<sub>IHF</sub> predicted ribbon models. Models were prepared by Geno3D server [36], proteins were visualized in the PyMOL [64]. The C-terminal hydrophobic region (Val245-Val256) of ricin A-chain in all models is shown in green. (B) Combined fragments of the backbone models of wild-type ricin A-chain (marked in red, hydrophobic region in green), DHF ricin A-chain (marked in turquoise) and IHF ricin A-chain (marked in pink). In the foreground hydrophobic regions are presented, sticks are indicated. (C) Electrostatic surface models for structures presented in (A). Color code is indicated (local PyMOL scale).

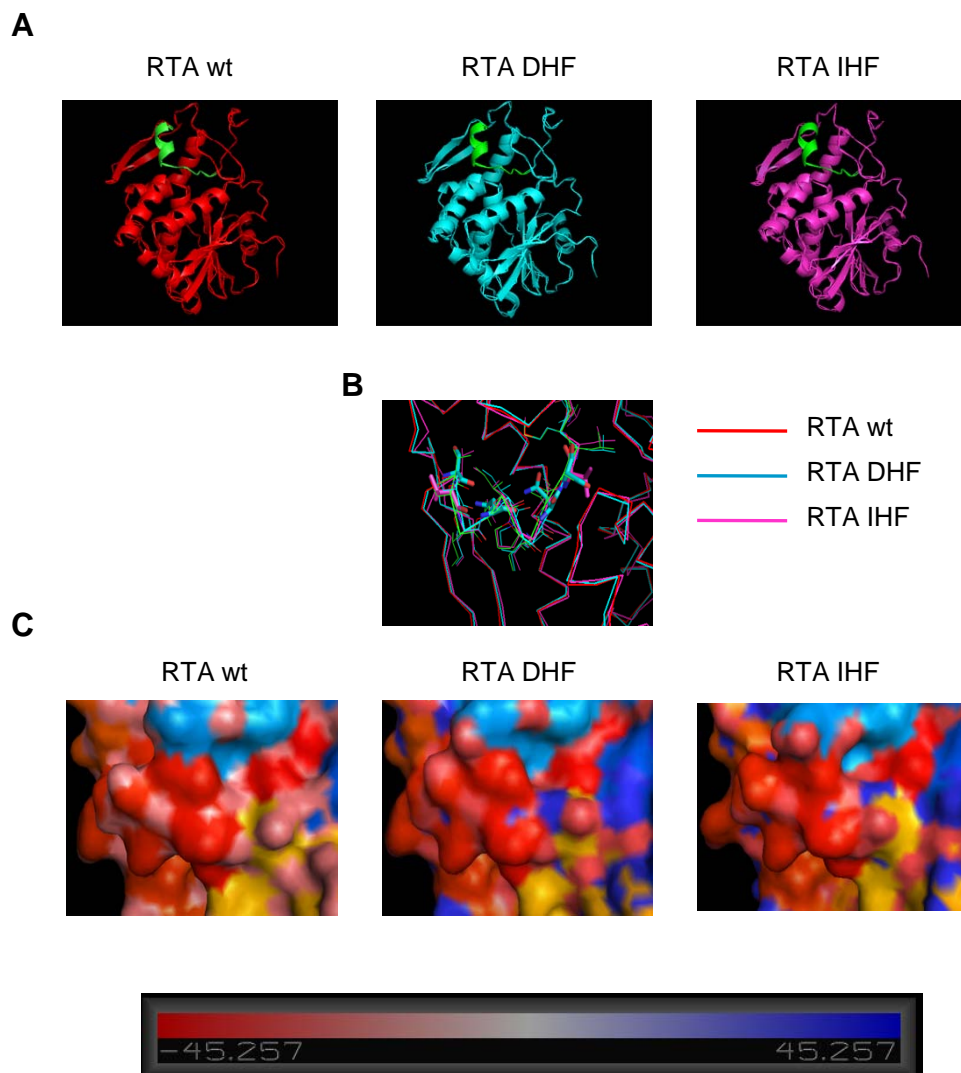

Supplement: 12860_2015_47_MOESM1_ESM.pdf [file 12860_2015_47_MOESM1_ESM.pdf]
