# Supplementary material for: Hydrophobicity of protein determinants influences the recognition of substrates by EDEM1 and EDEM2 in human cells
Source: PubMed Central journal article supplement (PMC4340280; doi:10.1186/s12860-015-0047-7), 2015-02-06

**Additional file 2. Stability of RTA<sub>DHF</sub> and RTA<sub>IHF</sub>.** Coomassie Blue-stained 12% SDS/PAGE gels showing the effect of the incubation of 500 ng of wild-type ricin A-chain, RTA wt, and modified ricin A-chains: RTA<sub>DHF</sub> and RTA<sub>IHF</sub>, with increasing concentrations of pronase. Digestion patterns for denatured forms of RTA are also shown.

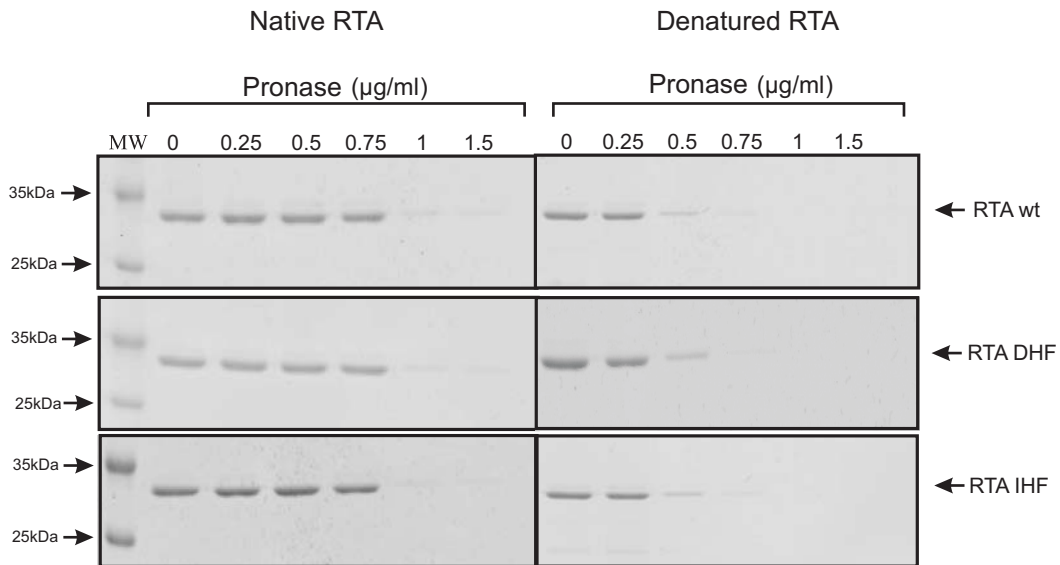

Supplement: 12860_2015_47_MOESM2_ESM.pdf [file 12860_2015_47_MOESM2_ESM.pdf]
