# Supplementary material for: Hydrophobicity of protein determinants influences the recognition of substrates by EDEM1 and EDEM2 in human cells
Source: PubMed Central journal article supplement (PMC4340280; doi:10.1186/s12860-015-0047-7), 2015-02-06

**Additional file 4. BACE457 and BACE457<sub>DHF</sub> luminal parts predicted ribbon models.**  
Models were prepared by Geno3D server [36], proteins were visualized in the PyMOL [64].

BACE457

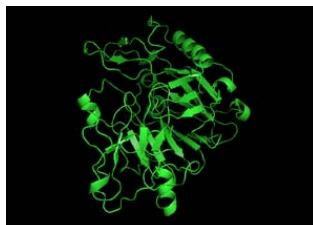

BACE457 DHF

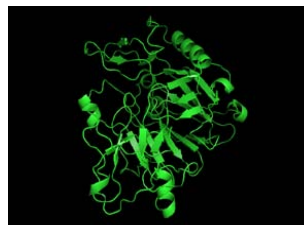

Supplement: 12860_2015_47_MOESM4_ESM.pdf [file 12860_2015_47_MOESM4_ESM.pdf]
